# Supplementary material
Source: publisher figshare collection journal article supplement (https://gsajournals.figshare.com/ndownloader/files/22699349)
Supplement: Supplementary file 1 [file 22699349]

## Sheet: Sheet1
Table S4. List of the 351 genes assigned Gene Ontology (GO) accession numbers in Anopheles sinensis.
Transcript ID	GO#
ASIC000263	GO:0016020	GO:0016757
ASIC000387	GO:0003779
ASIC000598	GO:0005871	GO:0007018	GO:0008017	GO:0005524	GO:0003777
ASIC000651	GO:0008152	GO:0003824
ASIC000721	GO:0016772	GO:0004674	GO:0006468	GO:0005524	GO:0004672
ASIC000823	GO:0005515	GO:0016311	GO:0016791	GO:0006470	GO:0004725
ASIC000958	GO:0005515
ASIC001190	GO:0003824	GO:0006508	GO:0004252
ASIC001509	GO:0003676	GO:0005634	GO:0008270	GO:0046872
ASIC001836	GO:0005515
ASIC002160	GO:0005515
ASIC002278	GO:0003677	GO:0005634	GO:0006289	GO:0003684
ASIC002332	GO:0005525
ASIC002417	GO:0003677
ASIC002418	GO:0030246	GO:0003824	GO:0005975	GO:0004553
ASIC002447	GO:0006810	GO:0005230	GO:0016020	GO:0016021	GO:0006811
ASIC002474	GO:0003676	GO:0005634	GO:0008270	GO:0046872
ASIC002476	GO:0003676	GO:0046872
ASIC002487	GO:0005515
ASIC002632	GO:0033961	GO:0003824
ASIC002672	GO:0003810	GO:0018149
ASIC002711	GO:0005576	GO:0006030	GO:0008061
ASIC002752	GO:0036038	GO:0042384	GO:0010826	GO:0000166	GO:0003676
ASIC002789	GO:0016020	GO:0006810	GO:0005215
ASIC002801	GO:0003824
ASIC002803	GO:0016020	GO:0006810	GO:0005215
ASIC002906	GO:0008017	GO:0005515
ASIC002949	GO:0006515	GO:0030163	GO:0004252	GO:0005524	GO:0006508	GO:0004176
ASIC002959	GO:0003824	GO:0016051
ASIC002991	GO:0019013
ASIC003135	GO:0055114	GO:0020037	GO:0016705	GO:0005506
ASIC003247	GO:0003676	GO:0005634	GO:0046872	GO:0008270	GO:0005515
ASIC003328	GO:0032324	GO:0006777
ASIC003351	GO:0006511
ASIC003417	GO:0004866
ASIC003453	GO:0016020	GO:0007608	GO:0005549	GO:0004984
ASIC003486	GO:0005634	GO:0008270
ASIC003518	GO:0005488
ASIC003556	GO:0008270	GO:0004518	GO:0030870	GO:0006281	GO:0005524
ASIC003617	GO:0046872	GO:0008270	GO:0005515
ASIC003679	GO:0005515
ASIC003920	GO:0003824	GO:0006508	GO:0004252
ASIC003949	GO:0005515
ASIC003974	GO:0005764	GO:0006665	GO:0006629
ASIC004075	GO:0005634
ASIC004081	GO:0005975	GO:0004553
ASIC004087	GO:0005576	GO:0006030	GO:0008061
ASIC004130	GO:0000145	GO:0015031	GO:0006904
ASIC004186	GO:0008201
ASIC004223	GO:0008146
ASIC004315	GO:0006066	GO:0008812	GO:0055114	GO:0050660	GO:0016614
ASIC004389	GO:0003824	GO:0006508	GO:0004252
ASIC004511	GO:0016747	GO:0005634	GO:0006355	GO:0008270	GO:0003700
ASIC004540	GO:0005634	GO:0051028	GO:0005515
ASIC004663	GO:0002161	GO:0006429	GO:0004823	GO:0006418	GO:0005524	GO:0004812	GO:0000166
ASIC004676	GO:0030286	GO:0007018	GO:0003777
ASIC004810	GO:0003824	GO:0008152	GO:0008484
ASIC004861	GO:0003824	GO:0006508	GO:0004252
ASIC004980	GO:0003824	GO:0008152	GO:0008484
ASIC005401	GO:0003824	GO:0046872	GO:0006508	GO:0004222
ASIC005515	GO:0006730	GO:0008270	GO:0004089
ASIC005692	GO:0015935	GO:0005761	GO:0006915
ASIC005735	GO:0008270	GO:0005634	GO:0003677	GO:0005515
ASIC005889	GO:0016020	GO:0005234	GO:0004970
ASIC005912	GO:0006032	GO:0004568	GO:0005576	GO:0006030	GO:0008061	GO:0005975	GO:0004553
ASIC005935	GO:0005515
ASIC005970	GO:0005975	GO:0004553
ASIC005991	GO:0005515
ASIC006095	GO:0008270
ASIC006096	GO:0006685	GO:0004767	GO:0016787
ASIC006226	GO:0005634	GO:0006351	GO:0003700	GO:0003676	GO:0046872	GO:0005515
ASIC006402	GO:0016887	GO:0016021	GO:0055085	GO:0006810	GO:0042626	GO:0005524
ASIC006404	GO:0016887	GO:0016021	GO:0055085	GO:0006810	GO:0042626	GO:0005524
ASIC006445	GO:0046872	GO:0008270	GO:0005515
ASIC006446	GO:0000166
ASIC006468	GO:0004518	GO:0003677
ASIC006529	GO:0005515	GO:0003676	GO:0005634	GO:0006355	GO:0008270	GO:0003700
ASIC006532	GO:0005507	GO:0055114	GO:0016491
ASIC006551	GO:0032012	GO:0005086
ASIC006659	GO:0016772	GO:0004674	GO:0006468	GO:0005524	GO:0004672
ASIC006661	GO:0005515
ASIC006668	GO:0003824	GO:0055114	GO:0008033	GO:0050660	GO:0017150	GO:0046872
ASIC006689	GO:0006396	GO:0004000	GO:0003723
ASIC006858	GO:0006032	GO:0004568	GO:0005975	GO:0004553
ASIC006862	GO:0016311	GO:0016791	GO:0004725	GO:0006470	GO:0008138	GO:0005515
ASIC006903	GO:0030141	GO:0007218	GO:0004386
ASIC006951	GO:0016075	GO:0006396	GO:0004525	GO:0003723
ASIC006968	GO:0005488
ASIC006980	GO:0016491	GO:0055114
ASIC007022	GO:0005515
ASIC007389	GO:0005524
ASIC007425	GO:0008152	GO:0016758
ASIC007433	GO:0043546	GO:0051537	GO:0055114	GO:0046872	GO:0016491	GO:0051536	GO:0009055
ASIC007467	GO:0055114	GO:0016491
ASIC007518	GO:0005515
ASIC007569	GO:0005515
ASIC007683	GO:0005515
ASIC007807	GO:0003824	GO:0005515	GO:0006508	GO:0004252
ASIC007873	GO:0042981	GO:0007165	GO:0005515
ASIC007949	GO:0016887	GO:0016021	GO:0055085	GO:0006810	GO:0042626	GO:0005524
ASIC007965	GO:0003676
ASIC008005	GO:0005634	GO:0034968	GO:0018024	GO:0008270	GO:0005515
ASIC008068	GO:0005666	GO:0006383	GO:0003899	GO:0003677
ASIC008110	GO:0016020	GO:0007608	GO:0005549	GO:0004984
ASIC008153	GO:0044255	GO:0008374	GO:0008152	GO:0016746
ASIC008191	GO:0006270	GO:0001882	GO:0006139	GO:0003676	GO:0006260	GO:0003677	GO:0000166	GO:0003887
ASIC008219	GO:0006355	GO:0043565	GO:0003677
ASIC008314	GO:0005515	GO:0005622	GO:0006396
ASIC008383	GO:0003676	GO:0046872
ASIC008461	GO:0005515	GO:0000786	GO:0006334	GO:0003677	GO:0005634	GO:0006355	GO:0016747
ASIC008467	GO:0005515
ASIC008531	GO:0007169	GO:0006468	GO:0005524	GO:0004714	GO:0016020
ASIC008587	GO:0005488	GO:0016772
ASIC008618	GO:0006281	GO:0003913
ASIC008665	GO:0016021	GO:0005789	GO:0015031
ASIC008763	GO:0016772
ASIC008819	GO:0005515
ASIC008912	GO:0005488	GO:0006511	GO:0036459
ASIC008921	GO:0005871	GO:0007018	GO:0008017	GO:0005524	GO:0003777
ASIC008956	GO:0005978	GO:0003844	GO:0043169	GO:0003824	GO:0005975	GO:0004553
ASIC009070	GO:0005975	GO:0003824
ASIC009227	GO:0005515
ASIC009304	GO:0005576	GO:0006030	GO:0008061
ASIC009377	GO:0016020	GO:0007608	GO:0005549	GO:0004984
ASIC009423	GO:0005515
ASIC009449	GO:0008152	GO:0003951	GO:0035556	GO:0005515	GO:0007205	GO:0004143
ASIC009537	GO:0005515	GO:0005856
ASIC009578	GO:0005524	GO:0003676
ASIC009593	GO:0008270	GO:0006511	GO:0036459
ASIC009668	GO:0046856
ASIC009780	GO:0008430
ASIC009841	GO:0005515
ASIC009856	GO:0003824	GO:0006164	GO:0004643	GO:0003937
ASIC009884	GO:0030488	GO:0009019	GO:0016740
ASIC009890	GO:0003676	GO:0046872
ASIC009894	GO:0008270	GO:0005515
ASIC009916	GO:0006066	GO:0008812	GO:0055114	GO:0050660	GO:0016614
ASIC009939	GO:0016747
ASIC009989	GO:0003824	GO:0006508	GO:0004252
ASIC010428	GO:0005515
ASIC010441	GO:0005515
ASIC010568	GO:0005515
ASIC010614	GO:0005549
ASIC010691	GO:0016567	GO:0046872	GO:0004842	GO:0005515	GO:0008270
ASIC010696	GO:0003676	GO:0005634	GO:0008270	GO:0046872
ASIC010716	GO:0005515
ASIC011007	GO:0008270	GO:0005515
ASIC011020	GO:0003824
ASIC011034	GO:0005868	GO:0007018	GO:0005515
ASIC011049	GO:0016311	GO:0016791	GO:0006470	GO:0004725
ASIC011064	GO:0016020	GO:0006898	GO:0004872	GO:0005509	GO:0005515
ASIC011115	GO:0005578	GO:0007165	GO:0005515	GO:0005509
ASIC011322	GO:0005622	GO:0006810	GO:0005215
ASIC011723	GO:0005515	GO:0005737	GO:0006546	GO:0004047	GO:0055114	GO:0016491
ASIC011755	GO:0016020	GO:0071805	GO:0005267
ASIC011781	GO:0000166	GO:0030529	GO:0005634	GO:0006396	GO:0003723
ASIC011903	GO:0003824	GO:0006508	GO:0004252
ASIC011931	GO:0030285	GO:0048488	GO:0005262	GO:0016021
ASIC012012	GO:0016747
ASIC012065	GO:0016747	GO:0003824	GO:0055114	GO:0016491	GO:0008270	GO:0008152	GO:0016740	GO:0009058	GO:0016788
ASIC012154	GO:0005515	GO:0005622	GO:0008270
ASIC012159	GO:0005634	GO:0016568	GO:0008270	GO:0005515
ASIC012167	GO:0005615
ASIC012171	GO:0005515
ASIC012204	GO:0016021	GO:0055085
ASIC012353	GO:0016747
ASIC012435	GO:0016772	GO:0005515	GO:0006468	GO:0005524	GO:0004672	GO:0035023	GO:0005089
ASIC012664	GO:0003824	GO:0006508	GO:0004252
ASIC012693	GO:0005515
ASIC012780	GO:0003677	GO:0005634	GO:0043401	GO:0006355	GO:0003707	GO:0003700
ASIC012923	GO:0055114	GO:0020037	GO:0016705	GO:0005506
ASIC012946	GO:0005524
ASIC013011	GO:0051103	GO:0003909	GO:0003677	GO:0071897	GO:0006310	GO:0006281	GO:0005524	GO:0003910
ASIC013027	GO:0003676	GO:0046872
ASIC013068	GO:0050661	GO:0050660	GO:0020037	GO:0005516	GO:0006809	GO:0004517	GO:0016491	GO:0055114	GO:0010181	GO:0005506
ASIC013180	GO:0005576	GO:0006030	GO:0008061
ASIC013249	GO:0003676	GO:0005634	GO:0008270	GO:0046872
ASIC013250	GO:0003676	GO:0046872
ASIC013251	GO:0016887	GO:0005524
ASIC013260	GO:0008270	GO:0003676
ASIC013297	GO:0003676	GO:0046872
ASIC013306	GO:0016772	GO:0004674	GO:0006468	GO:0005524	GO:0004672
ASIC013309	GO:0005643	GO:0006606
ASIC013324	GO:0003824	GO:0006508	GO:0004252
ASIC013347	GO:0003676	GO:0046872
ASIC013481	GO:0031011
ASIC013517	GO:0003676	GO:0046872
ASIC013613	GO:0016459	GO:0005524	GO:0003774	GO:0005856	GO:0005515
ASIC013619	GO:0034968	GO:0018024	GO:0008270	GO:0005634	GO:0003677	GO:0005515
ASIC013630	GO:0016020	GO:0006508	GO:0008241	GO:0008237
ASIC013704	GO:0005488
ASIC013711	GO:0016021	GO:0050909
ASIC013955	GO:0016020	GO:0006493	GO:0000030
ASIC014050	GO:0005856	GO:0007020	GO:0005815	GO:0000922	GO:0000226
ASIC014071	GO:0005515
ASIC014180	GO:0006351	GO:0003899	GO:0003677
ASIC014202	GO:0010508
ASIC014212	GO:0006259	GO:0006265	GO:0005524	GO:0003918	GO:0003677
ASIC014226	GO:0016021	GO:0050909
ASIC014298	GO:0036157	GO:0036158
ASIC014307	GO:0003993
ASIC014313	GO:0016021	GO:0008272	GO:0015116
ASIC014345	GO:0016020	GO:0007608	GO:0005549	GO:0004984
ASIC014362	GO:0016592	GO:0006357	GO:0001104
ASIC014374	GO:0000166	GO:0003676
ASIC014611	GO:0006413	GO:0003743
ASIC014635	GO:0005515
ASIC014647	GO:0005515	GO:0008270
ASIC014687	GO:0006427	GO:0005524	GO:0004821	GO:0006418	GO:0004812	GO:0005737
ASIC014690	GO:0016788	GO:0006629
ASIC014745	GO:0016020	GO:0055085	GO:0006811	GO:0005216	GO:0005515
ASIC014813	GO:0006955	GO:0030247	GO:0005044	GO:0016020
ASIC014856	GO:0032021	GO:0034244
ASIC015042	GO:0008152	GO:0003824
ASIC015050	GO:0006032	GO:0004568	GO:0005975	GO:0004553
ASIC015093	GO:0005871	GO:0007018	GO:0008017	GO:0005524	GO:0003777
ASIC015140	GO:0046983	GO:0005737	GO:0005667	GO:0005634	GO:0006355	GO:0003700	GO:0007165	GO:0004871
ASIC015363	GO:0035145	GO:0006397	GO:0003723
ASIC015395	GO:0008270	GO:0005515
ASIC015401	GO:0005515
ASIC015402	GO:0005975	GO:0043169	GO:0003824
ASIC015436	GO:0008270	GO:0005515
ASIC015501	GO:0009052	GO:0004751
ASIC015521	GO:0030286	GO:0007018	GO:0003777
ASIC015606	GO:0003824	GO:0006508	GO:0004252
ASIC015787	GO:0055085
ASIC015826	GO:0008152	GO:0016758
ASIC015872	GO:0018095	GO:0006464
ASIC016359	GO:0005515
ASIC016569	GO:0016747
ASIC016570	GO:0016747
ASIC016600	GO:0016817	GO:0016818	GO:0005524	GO:0003676
ASIC016685	GO:0006259	GO:0008094	GO:0005524	GO:0003677
ASIC016712	GO:0016021
ASIC016713	GO:0005739
ASIC016724	GO:0000166	GO:0003676
ASIC016828	GO:0005515	GO:0018193
ASIC016864	GO:0008270	GO:0005515
ASIC016875	GO:0016772	GO:0004674	GO:0006468	GO:0005524	GO:0004672
ASIC016960	GO:0005515
ASIC016967	GO:0005515
ASIC017045	GO:0000166	GO:0003676
ASIC017071	GO:0003676	GO:0005760	GO:0006260	GO:0003887	GO:0003677
ASIC017077	GO:0003824	GO:0009058	GO:0030170
ASIC017188	GO:0005515
ASIC017193	GO:0005667	GO:0006355	GO:0003700
ASIC017261	GO:0016747	GO:0008080
ASIC017299	GO:0009058	GO:0003824	GO:0006508	GO:0004252
ASIC017424	GO:0042302
ASIC017454	GO:0005509
ASIC017533	GO:0046872	GO:0005515
ASIC017537	GO:0005576	GO:0006030	GO:0008061
ASIC017572	GO:0005515
ASIC017610	GO:0046872
ASIC017714	GO:0016021	GO:0050909
ASIC017717	GO:0016021	GO:0050909
ASIC017800	GO:0003677
ASIC017824	GO:0055114	GO:0020037	GO:0016705	GO:0005506
ASIC017868	GO:0016021
ASIC017885	GO:0008152	GO:0003824
ASIC017912	GO:0003824	GO:0008152	GO:0016791
ASIC017915	GO:0008270
ASIC017965	GO:0016021	GO:0030148	GO:0016705	GO:0006629
ASIC018019	GO:0005515
ASIC018073	GO:0005515
ASIC018142	GO:0003676
ASIC018179	GO:0005515
ASIC018441	GO:0008152	GO:0016758
ASIC018472	GO:0003824	GO:0008152	GO:0008484
ASIC018515	GO:0005515
ASIC018516	GO:0005515
ASIC018648	GO:0005634	GO:0016817	GO:0006351	GO:0008270	GO:0005515
ASIC018656	GO:0016772	GO:0004674	GO:0006468	GO:0005524	GO:0004672
ASIC018679	GO:0005515
ASIC018704	GO:0005524
ASIC018752	GO:0000166	GO:0003676
ASIC018916	GO:0008152	GO:0016758
ASIC018921	GO:0005506	GO:0050660	GO:0016614	GO:0003824	GO:0051537	GO:0046872	GO:0055114	GO:0016491	GO:0051536	GO:0009055
ASIC018927	GO:0008270	GO:0005515
ASIC018941	GO:0032300	GO:0006298	GO:0030983	GO:0005524
ASIC018980	GO:0055114	GO:0016491	GO:0005507
ASIC018987	GO:0035023	GO:0005089
ASIC019040	GO:0016021	GO:0005515	GO:0055114	GO:0020037	GO:0016705	GO:0005506
ASIC019103	GO:0005515
ASIC019142	GO:0008270	GO:0005515
ASIC019151	GO:0008152	GO:0016787
ASIC019169	GO:0016021	GO:0050909
ASIC019233	GO:0016817	GO:0005524	GO:0003677
ASIC019236	GO:0005488
ASIC019353	GO:0003824	GO:0016772	GO:0005524	GO:0004674
ASIC019368	GO:0005576	GO:0006030	GO:0008061
ASIC019374	GO:0005488	GO:0033596	GO:0043547	GO:0032007	GO:0051056	GO:0005096
ASIC019383	GO:0006355	GO:0043565	GO:0003700
ASIC019487	GO:0005515
ASIC019517	GO:0003979	GO:0055114	GO:0051287	GO:0016616
ASIC019518	GO:0016020
ASIC019657	GO:0006355	GO:0043565	GO:0003700
ASIC019697	GO:0016887	GO:0005524
ASIC019736	GO:0008270	GO:0005515	GO:0005524	GO:0003677
ASIC019742	GO:0005639
ASIC019750	GO:0005515
ASIC019762	GO:0005515
ASIC019796	GO:0005578	GO:0007165	GO:0005509	GO:0005515
ASIC019848	GO:0005524	GO:0003676	GO:0006261	GO:0006260	GO:0003887	GO:0003677
ASIC019857	GO:0005515
ASIC019888	GO:0016772	GO:0004674	GO:0006468	GO:0005524	GO:0004672
ASIC019963	GO:0008270	GO:0005515
ASIC019990	GO:0003676	GO:0046872
ASIC019995	GO:0005515
ASIC019996	GO:0016651	GO:0016491	GO:0051536	GO:0009055	GO:0016020	GO:0055114	GO:0042773	GO:0008137
ASIC020103	GO:0008270	GO:0005515
ASIC020114	GO:0046872
ASIC020161	GO:0005975	GO:0004553
ASIC020227	GO:0016020	GO:0005234	GO:0004970
ASIC020379	GO:0055114	GO:0020037	GO:0016705	GO:0005506
ASIC020407	GO:0003824	GO:0006222	GO:0004152	GO:0051536	GO:0005737	GO:0055114	GO:0016627
ASIC020538	GO:0016021	GO:0007186	GO:0004930
ASIC020562	GO:0016042	GO:0005509	GO:0004623
ASIC020573	GO:0008270	GO:0005515
ASIC020602	GO:0003677	GO:0016021	GO:0006355	GO:0005634	GO:0006351
ASIC020730	GO:0005975	GO:0043169	GO:0003824
ASIC020732	GO:0005975	GO:0043169	GO:0003824
ASIC020843	GO:0008152	GO:0003824
ASIC020867	GO:0003676	GO:0046872
ASIC020902	GO:0016020	GO:0006814	GO:0005272
ASIC020946	GO:0008270	GO:0008237	GO:0006508
ASIC020957	GO:0005515
ASIC020978	GO:0005634	GO:0006355	GO:0016747	GO:0008270	GO:0005515
ASIC021092	GO:0016020	GO:0007155
ASIC021208	GO:0005488	GO:0006396	GO:0008173	GO:0003723
ASIC021325	GO:0016021	GO:0055085
ASIC021357	GO:0005515
ASIC021425	GO:0046983
ASIC021457	GO:0005515
ASIC021459	GO:0003677	GO:0032784	GO:0006357	GO:0003676	GO:0006139	GO:0016788	GO:0003723	GO:0005515
ASIC021528	GO:0005634	GO:0051287	GO:0006471	GO:0003950	GO:0008270	GO:0003677
ASIC021666	GO:0005488	GO:0005634	GO:0006303	GO:0005524	GO:0004677	GO:0003677	GO:0016772	GO:0005515	GO:0016773
ASIC021690	GO:0016021
ASIC021712	GO:0003723
ASIC021809	GO:0005488	GO:0005515
ASIC021866	GO:0005525	GO:0003924
ASIC022024	GO:0003924	GO:0000287	GO:0005525
ASIC022078	GO:0005515
ASIC022083	GO:0016020	GO:0006508	GO:0008241	GO:0008237
ASIC022145	GO:0016020	GO:0007156	GO:0005509
ASIC022191	GO:0016021	GO:0006836	GO:0005328
ASIC022236	GO:0005515
ASIC022287	GO:0008152	GO:0003824	GO:0035091
ASIC022312	GO:0005515
ASIC022318	GO:0005634	GO:0006351	GO:0003700	GO:0040034	GO:0006357	GO:0000981	GO:0003676	GO:0046872
ASIC022333	GO:0016887	GO:0005524
